# Supplementary material for: Delirium and High Fever Are Associated with Subacute Motor Deterioration in Parkinson Disease: A Nested Case-Control Study
Source: PubMed Central journal article supplement (PMC4041721; doi:10.1371/journal.pone.0094944), 2014-06-02
Supplement: pone.0094944.s001.pdf [file pone.0094944.s001.pdf]

**Table S1. Comparison between patients who were admitted because of inflammation and those who developed inflammation during hospitalization.**

|                                                                                                           | Patients with inflammation on admission (n=47) | Patients who developed inflammation during hospitalization (n=33) |
|-----------------------------------------------------------------------------------------------------------|------------------------------------------------|-------------------------------------------------------------------|
| Interval between baseline data in medical records and onset of systemic inflammation, median [range] days | 21 [2-61]                                      | 21 [1-112]                                                        |
| Causes of systemic inflammation                                                                           |                                                |                                                                   |
| Pneumonia, n [%]                                                                                          | 25 [53.2]                                      | 17 [51.5]                                                         |
| Upper respiratory inflammation, n [%]                                                                     | 3 [6.4]                                        | 3 [9.1]                                                           |
| Influenza, n [%]                                                                                          | 0 [0.0]                                        | 1 [3.0]                                                           |
| Pyelonephritis, n [%]                                                                                     | 1 [2.1]                                        | 4 [12.1]                                                          |
| Prostatitis, n [%]                                                                                        | 2 [4.3]                                        | 4 [12.1]                                                          |
| Gastroenteritis, n [%]                                                                                    | 3 [6.4]                                        | 0 [0.0]                                                           |
| Cholecystitis, n [%]                                                                                      | 3 [6.4]                                        | 0 [0.0]                                                           |
| Cellulitis, n [%]                                                                                         | 4 [8.5]                                        | 1 [3.0]                                                           |
| Malignant syndrome, n [%]                                                                                 | 4 [8.5]                                        | 0 [0.0]                                                           |
| Gouty attack, n [%]                                                                                       | 0 [0.0]                                        | 1 [3.0]                                                           |
| Burn, n [%]                                                                                               | 1 [2.1]                                        | 0 [0.0]                                                           |
| Not available, n [%]                                                                                      | 1 [2.1]                                        | 2 [6.1]                                                           |
