# Supplementary material for: Delirium and High Fever Are Associated with Subacute Motor Deterioration in Parkinson Disease: A Nested Case-Control Study
Source: PubMed Central journal article supplement (PMC4041721; doi:10.1371/journal.pone.0094944), 2014-06-02
Supplement: pone.0094944.s002.pdf [file pone.0094944.s002.pdf]

**Table S2. Progression of motor symptoms in the period before onset of systemic inflammation.**

|                                     |                 | Controls (n=49) | Cases (n=20)  |
|-------------------------------------|-----------------|-----------------|---------------|
| Interval, median [range] days       |                 | 188 [124–336]   | 189 [133–326] |
| Change in modified H-Y stage, n [%] | No change       | 44 [89.8]       | 19 [95.0]     |
|                                     | Worsened by 0.5 | 5 [10.2]        | 1 [5.0]       |
