# Supplementary material for: Delirium and High Fever Are Associated with Subacute Motor Deterioration in Parkinson Disease: A Nested Case-Control Study
Source: PubMed Central journal article supplement (PMC4041721; doi:10.1371/journal.pone.0094944), 2014-06-02
Supplement: pone.0094944.s003.pdf [file pone.0094944.s003.pdf]

**Table S3. Relevant clinical and other data of patients with both persistent and transient deterioration.**

|                                                      |           | Cases (n=23)                    |                               | <i>P</i> |
|------------------------------------------------------|-----------|---------------------------------|-------------------------------|----------|
|                                                      |           | Persistent deterioration (n=19) | Transient deterioration (n=4) |          |
| Male, n [%]                                          |           | 14 [73.7]                       | 3 [75.0]                      | 1.000    |
| Age of PD onset, mean [SD] Y                         |           | 68.7 [9.7]                      | 67.5 [7.3]                    | 0.871    |
| Age (at time of systemic inflammation), mean [SD] Y  |           | 77.7 [7.8]                      | 76.8 [7.9]                    | 0.968    |
| PD duration, mean [SD] Y                             |           | 9.1 [4.0]                       | 9.3 [1.0]                     | 1.000    |
| Modified H-Y stage, n [%]                            | 2.5–3     | 10 [52.6]                       | 2 [50.0]                      | 0.924    |
|                                                      | 4         | 9 [47.4]                        | 2 [50.0]                      |          |
| UPDRS-III score, mean [SD], n                        |           | 34.6 [9.6], 7                   | 41, 1                         | NA       |
| Dementia, n [%]                                      |           | 12 [63.2]                       | 3 [75.0]                      | 1.000    |
| MMSE score, mean [SD], n                             |           | 19.8 [5.7], 5                   | 26.0 [5.7], 2                 | 0.381    |
| History of psychosis, n [%]                          |           | 16 [84.2]                       | 4 [100.0]                     | 1.000    |
| Initial symptoms, non-tremor n [%]                   |           | 18 [94.7]                       | 3 [75.0]                      | 0.324    |
| Symptomatic orthostatic hypotension, n [%]           |           | 6 [31.6]                        | 2 [50.0]                      | 0.589    |
| LED, median [range] mg/day                           |           | 500 [300–898]                   | 624 [400–700]                 | 0.655    |
| Use of dopamine agonists, n [%]                      |           | 3 [15.8]                        | 0 [0.0]                       | 1.000    |
| Use of central anticholinergic drugs, n [%]          |           | 1 [0.5]                         | 0 [0.0]                       | 1.000    |
| Delirium, n [%]                                      |           | 15 [78.9]                       | 4 [100.0]                     | 1.000    |
| Peak body temperature, mean [SD] °C                  |           | 38.6 [0.8]                      | 38.9 [0.4]                    | 0.701    |
| Peak leukocyte count, mean [SD] ×10 <sup>3</sup> /μl |           | 12.5 [4.1]                      | 12.8 [2.4]                    | 0.490    |
| Peak plasma CRP concentration, mean [SD] mg/dl       |           | 11.7 [7.4]                      | 12.6 [6.7]                    | 0.766    |
| Duration of leukocytosis, n [%]                      | 1–3 days  | 4 [21.1]                        | 1 [25.0]                      | 0.959    |
|                                                      | 4–8 days  | 4 [21.1]                        | 1 [25.0]                      |          |
|                                                      | 9–34 days | 11 [57.9]                       | 2 [50.0]                      |          |
