# Supplementary material for: Delirium and High Fever Are Associated with Subacute Motor Deterioration in Parkinson Disease: A Nested Case-Control Study
Source: PubMed Central journal article supplement (PMC4041721; doi:10.1371/journal.pone.0094944), 2014-06-02
Supplement: pone.0094944.s004.pdf [file pone.0094944.s004.pdf]

**Table S4. Adjusted odds ratios for persistent motor deterioration (adjusted for age, sex, PD duration, modified H-Y stage, dementia and history of psychosis).**

|                                                       | B      | Odds ratio [95% CI] | P     |
|-------------------------------------------------------|--------|---------------------|-------|
| Delirium (yes vs. no)                                 | 2.36   | 10.60 [2.06–54.51]  | 0.005 |
| Peak body temperature (per one °C)                    | 1.02   | 2.78 [1.10–7.03]    | 0.032 |
| Sex (male vs. female)                                 | 1.06   | 2.88 [0.46–18.14]   | 0.259 |
| Age (at time of systemic inflammation) (per one year) | - 0.05 | 0.95 [0.85–1.07]    | 0.390 |
| PD duration (per one year)                            | - 0.19 | 0.83 [0.70–0.98]    | 0.028 |
| Modified H-Y stage (4 vs. 2.5–3 vs. 2)                | 1.06   | 2.88 [0.51–16.29]   | 0.231 |
| Dementia (yes vs. no)                                 | - 0.95 | 0.39 [0.06–2.42]    | 0.308 |
| History of psychosis (yes vs. no)                     | 2.25   | 9.44 [0.81–110.04]  | 0.073 |
